# Supplementary material
Source: PubMed Central journal article supplement (PMC3073318)
Supplement: NIHMS257830-supplement-Table.pdf [file NIHMS257830-supplement-Table.pdf]

# Alkyl–Alkyl Suzuki Cross-Couplings of Unactivated Secondary Alkyl Chlorides

Zhe Lu and Gregory C. Fu\*

*Department of Chemistry, Massachusetts Institute of Technology,  
Cambridge, Massachusetts 02139*

## Supporting Information

### Table of Contents

|                                     |      |
|-------------------------------------|------|
| I. General                          | S–1  |
| II. Suzuki Cross-Coupling Reactions | S–1  |
| III. Kinetics Data                  | S–11 |
| IV. <sup>1</sup> H NMR Spectra      | S–13 |

### I. General

The following reagents were purchased and used as received: 9-BBN dimer (Aldrich), NiBr<sub>2</sub>·diglyme (Aldrich; somewhat hygroscopic), KO*t*-Bu (Acros), *i*-BuOH (anhydrous, Aldrich), and *i*-Pr<sub>2</sub>O (anhydrous, Aldrich). Molecular sieves (4 Å, powdered, <5 μ; Aldrich) were flame-dried. Ligand (±)-1 was synthesized according to a procedure by Alper<sup>1</sup> and purified by flash chromatography (it is also available from Acros).

### II. Suzuki Cross-Coupling Reactions

**General procedure for the preparation of the boron reagent.** 9-BBN dimer (220 mg, 0.90 mmol) was added to a flask (equipped with a side arm and a stir bar), which was then sealed with a septum and successively evacuated and back-filled with argon three times. *i*-Pr<sub>2</sub>O (0.75 mL) and the alkene (1.8 mmol) were added, and the reaction mixture was stirred at 60 °C for 1 h. Next, the mixture was allowed to cool to r.t., and then KO*t*-Bu (150 mg, 1.2 mmol) and *i*-BuOH (180 μL, 2.0 mmol) were added in single portions under a positive pressure of argon. The resulting solution was stirred under argon for 30 min.

---

(1) Kuznetsov, V. F.; Jefferson, G. R.; Yap, G. P. A.; Alper, H. *Organometallics* **2002**, *21*, 4241–4248.

**General procedure for the Suzuki reaction.** NiBr<sub>2</sub>·diglyme (21 mg, 0.060 mmol) and 4 Å molecular sieves (200 mg) were added to a 5-mL oven-dried round-bottom flask (equipped with a stir bar), which was then sealed with a septum and successively evacuated and back-filled with argon three times. *i*-Pr<sub>2</sub>O (0.8 mL) was added, followed by ligand **1** (18 μL, 0.080 mmol). The mixture was stirred for 30 min, resulting in the formation of a pale-blue slurry. Next, the alkyl halide (1.0 mmol) and then the solution of the boron reagent (1.5 M; 1.8 mmol) were added by syringe. The reaction mixture was stirred vigorously at room temperature for 48 h. Then, it was passed through a short plug of silica gel, eluting with 1:1 Et<sub>2</sub>O/hexanes. The solvent was removed, and the product was purified by flash chromatography.

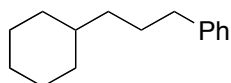

**(3-Cyclohexylpropyl)benzene (Table 2, entry 1) [170661-44-6].** Cyclohexyl chloride (119 μL, 1.0 mmol) and a solution of the boron reagent prepared by hydroboration of allylbenzene with 9-BBN dimer (1.5 M solution in *i*-Pr<sub>2</sub>O; 1.2 mL, 1.8 mmol) were used. The product was purified by flash chromatography (cyclohexane). Colorless oil. First run: 160 mg (79%). Second run: 162 mg (80%).

TLC: R<sub>f</sub> = 0.7 (cyclohexane; PMA).

<sup>1</sup>H NMR (400 MHz, CDCl<sub>3</sub>) δ 7.30-7.24 (m, 2H), 7.21-7.14 (m, 3H), 2.56 (t, 2H, *J* = 7.8 Hz), 1.75-1.59 (m, 7H), 1.30-1.07 (m, 6H), 0.97-0.80 (m, 2H).

<sup>13</sup>C NMR (100 MHz, CDCl<sub>3</sub>) δ 143.0, 128.4, 128.2, 125.6, 37.6, 37.2, 36.3, 33.4, 28.8, 26.7, 26.4.

FT-IR (neat) 2958, 2930, 2859, 1496, 1454, 745, 697 cm<sup>-1</sup>.

MS (EI) *m/z* (M<sup>+</sup>) calcd for C<sub>15</sub>H<sub>22</sub>: 202.2, found: 202.2.

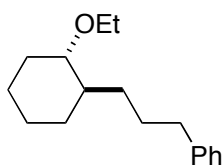

***trans*-(3-(2-Ethoxycyclohexyl)propyl)benzene (Table 2, entry 2).** *trans*-1-Chloro-2-ethoxycyclohexane (163 mg, 1.0 mmol; prepared according to a literature procedure<sup>2</sup>) and a solution of the boron reagent prepared by hydroboration of allylbenzene with 9-BBN dimer (1.5 M solution in *i*-Pr<sub>2</sub>O; 1.2 mL, 1.8 mmol) were used. The product was purified by flash chromatography (2%→5% EtOAc/hexanes). Clear oil. First run: 166 mg (67%). Second run: 176 mg (71%).

TLC: R<sub>f</sub> = 0.55 (10% EtOAc/hexanes; PMA).

---

(2) Mendonca, G. F.; Sanseverino, A. M.; De Mattos, M. C. S. *Synthesis* **2003**, 45–48.

$^1\text{H}$  NMR (400 MHz,  $\text{CDCl}_3$ )  $\delta$  7.30-7.24 (m, 2H), 7.20-7.14 (m, 3H), 3.68-3.60 (m, 1H), 3.37-3.29 (m, 1H), 2.85-2.77 (m, 1H), 2.68-2.51 (m, 2H), 2.07-2.01 (m, 1H), 1.87-1.50 (m, 7H), 1.37-1.07 (m, 5H), 1.17 (t, 3H,  $J = 7.0$  Hz).

$^{13}\text{C}$  NMR (100 MHz,  $\text{CDCl}_3$ )  $\delta$  143.2, 128.5, 128.3, 125.6, 82.2, 64.1, 43.2, 36.6, 32.2, 31.6, 30.6, 28.9, 25.6, 24.9, 15.8.

FT-IR (neat) 2928, 2858, 1496, 1449, 1104, 747, 698  $\text{cm}^{-1}$ .

MS (EI)  $m/z$  ( $\text{M}^+$ ) calcd for  $\text{C}_{17}\text{H}_{26}\text{O}$ : 246.2, found: 246.2.

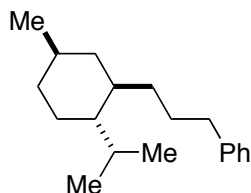

**(3-((1R,2S,5R)-2-Isopropyl-5-methylcyclohexyl)propyl)benzene (Table 2, entry 3).** (–)-Menthyl chloride (187  $\mu\text{L}$ , 1.0 mmol) and a solution of the boron reagent prepared by hydroboration of allylbenzene with 9-BBN dimer (1.5 M solution in  $i\text{-Pr}_2\text{O}$ ; 1.2 mL, 1.8 mmol) were used. The product was purified by flash chromatography (cyclohexane). Clear oil. First run: 135 mg (52%). Second run: 140 mg (54%).

TLC:  $R_f = 0.7$  (cyclohexane; PMA).

$^1\text{H}$  NMR (400 MHz,  $\text{CDCl}_3$ )  $\delta$  7.31-7.25 (m, 2H), 7.21-7.15 (m, 3H), 2.66-2.49 (m, 2H), 2.00-1.90 (m, 1H), 1.75-1.40 (m, 6H), 1.35-1.05 (m, 3H), 1.11-0.72 (m, 9H), 0.70 (d, 3H,  $J = 6.9$  Hz), 0.70-0.59 (m, 1H).

$^{13}\text{C}$  NMR (100 MHz,  $\text{CDCl}_3$ )  $\delta$  143.1, 128.5, 128.3, 125.7, 46.7, 41.4, 38.8, 36.7, 35.5, 33.0, 32.6, 28.0, 26.5, 24.5, 23.0, 21.8, 15.4.

FT-IR (neat) 2954, 2928, 2866, 1453, 1368, 745, 698  $\text{cm}^{-1}$ .

MS (EI)  $m/z$  ( $\text{M}^+$ ) calcd for  $\text{C}_{19}\text{H}_{30}$ : 258.2, found: 258.3.

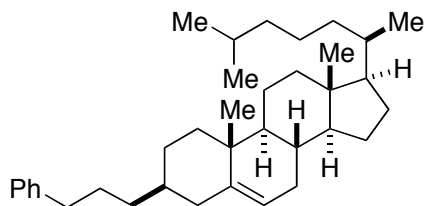

**3-(3-Phenylpropyl)cholest-5-ene (Table 2, entry 4).** Cholesteryl chloride (405 mg, 1.0 mmol) and a solution of the boron reagent prepared by hydroboration of allylbenzene with 9-BBN dimer (1.5 M solution in  $i\text{-Pr}_2\text{O}$ ; 1.2 mL, 1.8 mmol) were used. The product was purified by

flash chromatography (hexanes). Waxy solid. mp 65–70 °C. First run: 326 mg (67%). Second run: 328 mg (67%). The product was isolated as a 2:1 ( $\beta$ : $\alpha$ ) mixture of two diastereomers.<sup>3</sup>

TLC:  $R_f$  = 0.5 (hexanes; PMA).

<sup>1</sup>H NMR (400 MHz, CDCl<sub>3</sub>)  $\delta$  7.30-7.25 (m, 2H), 7.20-7.14 (m, 3H), 5.29-5.25 (m, 1H, major diastereomer), 5.23-5.20 (m, 1H, minor diastereomer), 2.58 (t, 2H,  $J$  = 8.4 Hz), 2.10-1.85 (m, 45H), 0.67 (s, 3H).

<sup>13</sup>C NMR (100 MHz, CDCl<sub>3</sub>)  $\delta$  (both diastereomers) 143.7, 143.0, 128.50, 128.47, 128.4, 128.3, 125.7, 119.3, 57.0, 56.3, 50.6, 42.4, 40.0, 39.8, 39.6, 39.4, 37.5, 37.4, 37.0, 36.4, 36.3, 35.9, 34.2, 32.0, 29.3, 28.9, 28.4, 28.2, 24.4, 24.0, 23.0, 22.7, 21.0, 19.6, 18.8, 12.0.

FT-IR (neat) 2933, 2867, 1461, 1376, 746, 648 cm<sup>-1</sup>.

MS (EI)  $m/z$  ( $M^+$ ) calcd for C<sub>36</sub>H<sub>56</sub>: 488.4, found: 488.5.

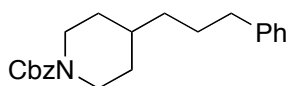

**Benzyl 4-(3-phenylpropyl)piperidine-1-carboxylate (Table 2, entry 5).** Benzyl 4-chloropiperidine-1-carboxylate (254 mg, 1.0 mmol) and a solution of the boron reagent prepared by hydroboration of allylbenzene with 9-BBN dimer (1.5 M solution in *i*-Pr<sub>2</sub>O; 1.2 mL, 1.8 mmol) were used. The product was purified by flash chromatography (5%→15% EtOAc/hexanes). White solid. mp 150 °C (dec). First run: 240 mg (71%). Second run: 229 mg (68%).

TLC:  $R_f$  = 0.15 (10% EtOAc/hexanes; PMA).

<sup>1</sup>H NMR (400 MHz, CDCl<sub>3</sub>)  $\delta$  7.40-7.20 (m, 7H), 7.20-7.10 (m, 3H), 5.11 (s, 2H), 4.15 (br s, 2H), 2.74 (br s, 2H), 2.59 (t, 2H, 7.6 Hz), 1.80-1.55 (m, 4H), 1.50-1.34 (m, 1H), 1.32-1.24 (m, 2H), 1.16-1.04 (m, 2H).

<sup>13</sup>C NMR (100 MHz, CDCl<sub>3</sub>)  $\delta$  155.4, 142.6, 137.1, 128.6, 128.45, 128.39, 128.0, 127.9, 125.8, 67.0, 45.0, 44.4, 36.2, 35.9, 28.6, 24.5.

FT-IR (neat) 2931, 2856, 1700, 1430, 1235, 749, 698 cm<sup>-1</sup>.

MS (ESI)  $m/z$  ( $M^+$ ) calcd for C<sub>22</sub>H<sub>27</sub>NO<sub>2</sub>: 337.2, found: 338.2 ( $M + H^+$ ), 360.2 ( $M + Na^+$ ).

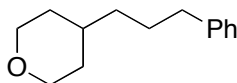

**4-(3-Phenylpropyl)tetrahydro-2H-pyran (Table 2, entry 6).** 4-Chlorotetrahydro-pyran (108  $\mu$ L, 1.0 mmol) and a solution of the boron reagent prepared by hydroboration of allylbenzene with 9-BBN dimer (1.5 M solution in *i*-Pr<sub>2</sub>O; 1.2 mL, 1.8 mmol) were used. The product was purified by flash chromatography (5%→15% EtOAc/hexanes). Colorless oil. First run: 149 mg (73%). Second run: 141 mg (69%).

---

(3) The stereochemistry was assigned by analogy to: Okamura, W. H.; Mitra, M. N.; Pirio, M. R.; Mourino, A.; Carey, S. C.; Norman, A. W. *J. Org. Chem.* **1978**, *43*, 574–580.

TLC:  $R_f = 0.25$  (10% EtOAc/hexanes; PMA).

$^1\text{H}$  NMR (400 MHz,  $\text{CDCl}_3$ )  $\delta$  7.30-7.24 (m, 2H), 7.20-7.14 (m, 3H), 3.93 (ddd, 2H,  $J = 11.5, 4.7, 1.2$  Hz), 3.35 (td, 2H, 12.0, 1.8 Hz), 2.59 (t, 2H, 7.7 Hz), 1.70-1.42 (m, 5H), 1.35-1.20 (m, 4H).

$^{13}\text{C}$  NMR (100 MHz,  $\text{CDCl}_3$ )  $\delta$  142.8, 128.5, 128.4, 125.8, 68.3, 36.7, 36.2, 35.1, 33.3, 28.4.

FT-IR (neat) 2928, 2842, 1096, 748, 699  $\text{cm}^{-1}$ .

MS (EI)  $m/z$  ( $\text{M}^+$ ) calcd for  $\text{C}_{14}\text{H}_{20}\text{O}$ : 204.2, found: 204.2.

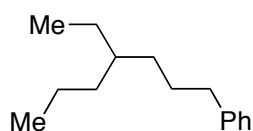

**(4-Ethylheptyl)benzene (Table 2, entry 7).** 3-Chlorohexane (139  $\mu\text{L}$ , 1.0 mmol) and a solution of the boron reagent prepared by hydroboration of allylbenzene with 9-BBN dimer (1.5 M solution in *i*-Pr<sub>2</sub>O; 1.2 mL, 1.8 mmol) were used. The product was purified by flash chromatography (cyclohexane). Colorless oil. First run: 145 mg (71%). Second run: 149 mg (73%).

TLC:  $R_f = 0.65$  (cyclohexane; PMA).

$^1\text{H}$  NMR (400 MHz,  $\text{CDCl}_3$ )  $\delta$  7.31-7.25 (m, 2H), 7.21-7.15 (m, 3H), 2.58 (t, 2H,  $J = 7.7$  Hz), 1.64-1.52 (m, 2H), 1.34-1.17 (m, 9H), 0.92-0.78 (m, 6H).

$^{13}\text{C}$  NMR (100 MHz,  $\text{CDCl}_3$ )  $\delta$  143.1, 128.5, 128.3, 125.7, 38.7, 36.6, 35.7, 33.0, 28.8, 26.0, 20.0, 14.6, 11.0.

FT-IR (neat) 2958, 2930, 1495, 1454, 746, 697  $\text{cm}^{-1}$ .

MS (EI)  $m/z$  ( $\text{M}^+$ ) calcd for  $\text{C}_{15}\text{H}_{24}$ : 204.2, found: 204.3.

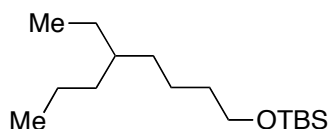

***tert*-Butyl(5-ethyloctyloxy)dimethylsilane (Table 2, entry 8).** 3-Chlorohexane (139  $\mu\text{L}$ , 1.0 mmol) and a solution of the boron reagent prepared by hydroboration of (but-3-enyloxy)(*tert*-butyl)dimethylsilane (prepared according to a literature procedure<sup>4</sup>) with 9-BBN dimer (1.5 M solution in *i*-Pr<sub>2</sub>O; 1.2 mL, 1.8 mmol) were used. The product was purified by flash chromatography (hexanes). Colorless oil. First run: 180 mg (66%). Second run: 172 mg (63%).

TLC:  $R_f = 0.3$  (hexanes; PMA).

$^1\text{H}$  NMR (400 MHz,  $\text{CDCl}_3$ )  $\delta$  3.60 (t, 2H,  $J = 6.6$  Hz), 1.55-1.45 (m, 2H), 1.38-1.15 (m, 11H), 0.88 (s, 9H), 0.87 (t, 3H,  $J = 7.2$  Hz), 0.82 (t, 3H,  $J = 7.3$  Hz), 0.05 (s, 6H).

$^{13}\text{C}$  NMR (100 MHz,  $\text{CDCl}_3$ )  $\delta$  63.4, 38.8, 35.7, 33.5, 33.1, 26.1, 26.0, 23.0, 20.0, 18.5, 14.5, 11.0, -5.1.

---

(4) Ferrie, L.; Reymond, S.; Capdevielle, P.; Cossy, J. *Org. Lett.* **2007**, *9*, 2461–2464.

FT-IR (neat) 2958, 2930, 2860, 1463, 1255, 1102, 836, 774  $\text{cm}^{-1}$ .  
MS (EI)  $m/z$  ( $M^+$ ) calcd  $\text{C}_{16}\text{H}_{36}\text{OSi}$ : 272.2, found: 215.2 ( $M^+ - t\text{-Bu}$ ).

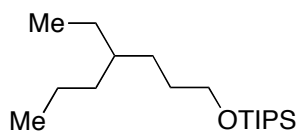

**(4-Ethylheptyloxy)triisopropylsilane (Table 2, entry 9).** 3-Chlorohexane (139  $\mu\text{L}$ , 1.0 mmol) and a solution of the boron reagent prepared by hydroboration of allyloxytriisopropylsilane (prepared according to a literature procedure<sup>5</sup>) with 9-BBN dimer (1.5 M solution in *i*-Pr<sub>2</sub>O; 1.2 mL, 1.8 mmol) were used. The product was purified by flash chromatography (hexanes). Colorless oil. First run: 189 mg (63%). Second run: 198 mg (66%).

TLC:  $R_f = 0.3$  (hexanes; PMA).

<sup>1</sup>H NMR (400 MHz,  $\text{CDCl}_3$ )  $\delta$  3.65 (t, 2H,  $J = 6.9$  Hz), 1.56-1.46 (m, 2H), 1.34-1.16 (m, 9H), 1.14-1.00 (m, 21H), 0.87 (t, 3H,  $J = 6.8$  Hz), 0.83 (t, 3H,  $J = 7.3$  Hz).

<sup>13</sup>C NMR (100 MHz,  $\text{CDCl}_3$ )  $\delta$  64.1, 38.6, 35.7, 30.3, 29.1, 26.0, 20.0, 18.2, 14.6, 12.2, 11.0.

FT-IR (neat) 2959, 2942, 2867, 1464, 1105, 883  $\text{cm}^{-1}$ .

MS (EI)  $m/z$  ( $M^+$ ) calcd for  $\text{C}_{18}\text{H}_{40}\text{OSi}$ : 300.3, found: 257.3 ( $M^+ - i\text{-Pr}$ ).

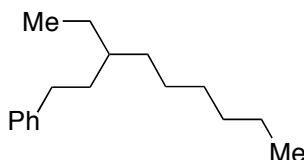

**(3-Ethylnonyl)benzene (Table 2, entry 10).** (3-Chloropentyl)benzene (183 mg, 1.0 mmol) and a solution of the boron reagent prepared by hydroboration of 1-hexene with 9-BBN dimer (1.5 M solution in *i*-Pr<sub>2</sub>O; 1.2 mL, 1.8 mmol) were used. The product was purified by flash chromatography (hexanes). Colorless oil. First run: 170 mg (73%). Second run: 172 mg (74%).

TLC:  $R_f = 0.7$  (hexanes; UV).

<sup>1</sup>H NMR (400 MHz,  $\text{CDCl}_3$ )  $\delta$  7.31-7.25 (m, 2H), 7.21-7.15 (m, 3H), 2.58 (t, 2H,  $J = 7.8$  Hz), 1.67-1.51 (m, 2H), 1.40-1.20 (m, 13H), 0.92-0.80 (m, 6H).

<sup>13</sup>C NMR (100 MHz,  $\text{CDCl}_3$ )  $\delta$  143.5, 128.5, 128.4, 125.6, 38.8, 35.4, 33.3, 33.2, 32.1, 29.9, 26.7, 25.9, 22.8, 14.3, 10.9.

FT-IR (neat) 2959, 2925, 2857, 1454, 743, 697  $\text{cm}^{-1}$ .

MS (EI)  $m/z$  ( $M^+$ ) calcd for  $\text{C}_{17}\text{H}_{28}$ : 232.2, found: 232.3.

(5) Frye, S. V.; Eliel, E. L. *J. Am Chem. Soc.* **1988**, *110*, 484–489.

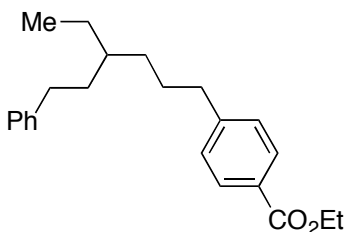

**Ethyl 4-(4-ethyl-6-phenylhexyl)benzoate (Table 2, entry 11).** (3-Chloropentyl)benzene (183 mg, 1.0 mmol) and a solution of the boron reagent prepared by hydroboration of ethyl 4-allylbenzoate (prepared according to a literature procedure<sup>6</sup>) with 9-BBN dimer (1.5 M solution in *i*-Pr<sub>2</sub>O; 1.2 mL, 1.8 mmol) were used. The product was purified by flash chromatography (5%→10% EtOAc/hexanes). Colorless oil. First run: 230 mg (71%). Second run: 234 mg (72%).

TLC:  $R_f = 0.3$  (10% EtOAc/hexanes; PMA).

<sup>1</sup>H NMR (400 MHz, CDCl<sub>3</sub>)  $\delta$  7.94-7.89 (m, 2H), 7.30-7.20 (m, 4H), 7.20-7.10 (m, 3H), 4.33 (q, 2H,  $J = 7.1$  Hz), 2.61 (t, 2H,  $J = 7.6$  Hz), 2.52 (dd, 2H,  $J = 12.4, 5.5$  Hz), 1.65-1.48 (m, 4H), 1.34 (t, 3H,  $J = 7.2$  Hz), 1.40-1.23 (m, 5H), 0.82 (t, 3H,  $J = 7.0$  Hz).

<sup>13</sup>C NMR (100 MHz, CDCl<sub>3</sub>)  $\delta$  166.9, 148.4, 143.2, 129.7, 128.6, 128.5, 128.45, 128.42, 125.7, 60.9, 38.5, 36.5, 35.2, 33.3, 32.7, 28.3, 25.8, 14.5, 10.9.

FT-IR (neat) 2933, 2859, 1718, 1275, 1106, 761, 699 cm<sup>-1</sup>.

MS (EI)  $m/z$  ( $M^+$ ) calcd for C<sub>23</sub>H<sub>30</sub>O<sub>2</sub>: 338.2, found: 338.3.

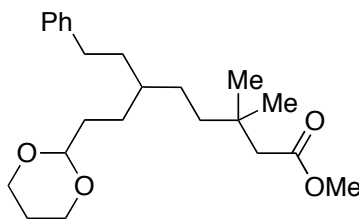

**Methyl 6-(2-(1,3-dioxan-2-yl)ethyl)-3,3-dimethyl-8-phenyloctanoate (Table 2, entry 12).** 2-(3-Chloro-5-phenylpentyl)-1,3-dioxane (139  $\mu$ L, 1.0 mmol) and a solution of the boron reagent prepared by hydroboration of 3,3-dimethyl-pent-4-enoic acid methyl ester with 9-BBN dimer (1.5 M solution in *i*-Pr<sub>2</sub>O; 1.2 mL, 1.8 mmol) were used. The product was purified by flash chromatography (CH<sub>2</sub>Cl<sub>2</sub>→7.5% EtOAc/CH<sub>2</sub>Cl<sub>2</sub>). Colorless oil. First run: 309 mg (82%). Second run: 301 mg (80%).

TLC:  $R_f = 0.5$  (20% EtOAc/hexanes; PMA).

<sup>1</sup>H NMR (400 MHz, CDCl<sub>3</sub>)  $\delta$  7.30-7.23 (m, 2H), 7.19-7.13 (m, 3H), 4.83 (t, 1H,  $J = 5.2$  Hz), 4.13-4.07 (m, 2H), 3.76 (td, 2H,  $J = 11.8, 1.9$  Hz), 3.63 (s, 3H), 2.61-2.54 (m, 2H), 2.14-2.01 (m, 1H), 1.62-1.50 (m, 5H), 1.42-1.24 (m, 9H), 0.98 (s, 6H).

<sup>13</sup>C NMR (100 MHz, CDCl<sub>3</sub>)  $\delta$  172.9, 143.1, 128.5, 128.4, 125.7, 102.8, 67.0, 51.2, 45.8, 38.9, 37.6, 35.5, 33.3, 33.1, 32.6, 27.6, 27.5, 27.4, 26.0.

FT-IR (neat) 2954, 2856, 1736, 1145, 746, 700 cm<sup>-1</sup>.

(6) Piazza, C.; Knochel, P. *Angew. Chem., Int. Ed.* **2002**, *41*, 3263–3265.

MS (EI)  $m/z$  ( $M^+$ ) calcd for  $C_{23}H_{36}O_4$ : 376.3, found: 375.3 ( $M^+ - H$ ).

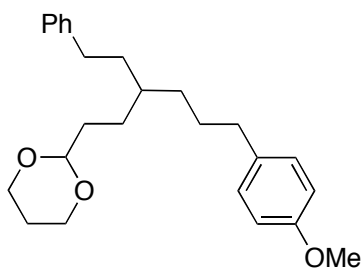

**2-(6-(4-Methoxyphenyl)-3-phenethylhexyl)-1,3-dioxane (Table 2, entry 13).** 2-(3-Chloro-5-phenylpentyl)-1,3-dioxane (139  $\mu$ L, 1.0 mmol) and a solution of the boron reagent prepared by hydroboration of 4-allylanisole with 9-BBN dimer (1.5 M solution in *i*-Pr<sub>2</sub>O; 1.2 mL, 1.8 mmol) were used. The product was purified by flash chromatography (5%  $\rightarrow$  10% EtOAc/hexanes). Colorless oil. First run: 314 mg (82%). Second run: 321 mg (84%).

TLC:  $R_f$  = 0.5 (10% EtOAc/hexanes; PMA).

<sup>1</sup>H NMR (400 MHz, CDCl<sub>3</sub>)  $\delta$  7.28-7.22 (m, 2H), 7.18-7.12 (m, 3H), 7.09-7.05 (m, 2H), 6.84-6.79 (m, 2H), 4.46 (t, 1H,  $J$  = 5.2 Hz), 4.12-4.06 (m, 2H), 3.78 (s, 3H), 3.77-3.69 (m, 2H), 2.60-2.47 (m, 4H), 2.14-2.00 (m, 1H), 1.62-1.51 (m, 6H), 1.45-1.29 (m, 6H).

<sup>13</sup>C NMR (100 MHz, CDCl<sub>3</sub>)  $\delta$  157.7, 143.1, 135.0, 129.4, 128.5, 128.4, 125.7, 113.8, 102.8, 83.8, 67.0, 55.4, 36.9, 35.5, 33.1, 33.0, 32.4, 28.8, 27.5, 26.0.

FT-IR (neat) 2928, 2856, 1512, 1245, 748, 700  $cm^{-1}$ .

MS (EI)  $m/z$  ( $M^+$ ) calcd for  $C_{25}H_{34}O_3$ : 382.2, found: 382.2.

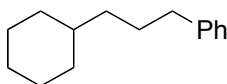

**(3-Cyclohexylpropyl)benzene (Table 3, entry 1) [170661-44-6].** Cyclohexyl bromide (163 mg, 1.0 mmol) and a solution of the boron reagent prepared by hydroboration of allylbenzene with 9-BBN dimer (1.5 M solution in *i*-Pr<sub>2</sub>O; 1.2 mL, 1.8 mmol) were used. First run: 152 mg (75%). Second run: 151 mg (75%).

**Table 3, entry 2.** Cyclohexyl iodide (210 mg, 1.0 mmol) and a solution of the boron reagent prepared by hydroboration of allylbenzene with 9-BBN dimer (1.5 M solution in *i*-Pr<sub>2</sub>O; 1.2 mL, 1.8 mmol) were used. First run: 148 mg (73%). Second run: 158 mg (78%).

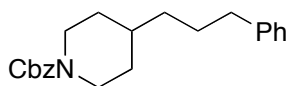

**Benzyl 4-(3-phenylpropyl)piperidine-1-carboxylate (Table 3, entry 3).** Benzyl 4-bromopiperidine-1-carboxylate (298 mg, 1.0 mmol) and a solution of the boron reagent prepared



by hydroboration of allylbenzene with 9-BBN dimer (1.5 M solution in *i*-Pr<sub>2</sub>O; 1.2 mL, 1.8 mmol) were used. First run: 217 mg (64%). Second run: 221 mg (66%).

**Table 3, entry 4.** Benzyl 4-iodopiperidine-1-carboxylate (345 mg, 1.0 mmol) and a solution of the boron reagent prepared by hydroboration of allylbenzene with 9-BBN dimer (1.5 M solution in *i*-Pr<sub>2</sub>O; 1.2 mL, 1.8 mmol) were used. First run: 216 mg (64%). Second run: 220 mg (65%).

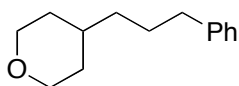

**4-(3-Phenylpropyl)tetrahydro-2H-pyran (Table 3, entry 5).** 4-Bromotetrahydropyran (165 mg, 1.0 mmol) and a solution of the boron reagent prepared by hydroboration of allylbenzene with 9-BBN dimer (1.5 M solution in *i*-Pr<sub>2</sub>O; 1.2 mL, 1.8 mmol) were used. First run: 144 mg (71%). 156 mg (76%).

**Table 3, entry 6.** 4-Iodotetrahydropyran (212 mg, 1.0 mmol) and a solution of the boron reagent prepared by hydroboration of allylbenzene with 9-BBN dimer (1.5 M solution in *i*-Pr<sub>2</sub>O; 1.2 mL, 1.8 mmol) were used. First run: 159 mg (78%). 155 mg (75%).

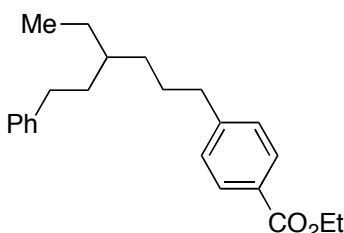

**Ethyl 4-(4-ethyl-6-phenylhexyl)benzoate (Table 3, entry 7).** (3-Bromopentyl)benzene (227 mg, 1.0 mmol) and a solution of the boron reagent prepared by hydroboration of ethyl 4-allylbenzoate (prepared according to a literature procedure<sup>6</sup>) with 9-BBN dimer (1.5 M solution in *i*-Pr<sub>2</sub>O; 1.2 mL, 1.8 mmol) were used. First run: 260 mg (77%). Second run: 251 mg (74%).

**Table 3, entry 8.** (3-Iodopentyl)benzene (274 mg, 1.0 mmol) and a solution of the boron reagent prepared by hydroboration of ethyl 4-allylbenzoate (prepared according to a literature procedure<sup>6</sup>) with 9-BBN dimer (1.5 M solution in *i*-Pr<sub>2</sub>O; 1.2 mL, 1.8 mmol) were used. First run: 254 mg (75%). Second run: 265 mg (78%).

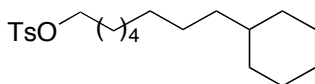

**8-Cyclohexyloctyl 4-methylbenzenesulfonate (Table 3, entry 9).** 5-Chloropentyl 4-methylbenzenesulfonate (277 mg, 1.0 mmol) and a solution of the boron reagent prepared by hydroboration of allylcyclohexane with 9-BBN dimer (1.5 M solution in *i*-Pr<sub>2</sub>O; 1.2 mL, 1.8

mmol) were used. The product was purified by flash chromatography (5% Et<sub>2</sub>O/hexanes). Colorless oil. First run: 236 mg (64%). Second run: 230 mg (62%).

TLC: R<sub>f</sub> = 0.5 (25% Et<sub>2</sub>O/hexanes; KMnO<sub>4</sub>).

<sup>1</sup>H NMR (CDCl<sub>3</sub>) δ 7.78 (d, 2H, J = 8.3 Hz), 7.34 (d, 2H, J = 8.3 Hz), 4.01 (t, 2H, J = 6.5 Hz), 2.44 (s, 3H), 1.71-1.55 (m, 7H), 1.32-1.07 (m, 16H), 0.90-0.78 (m, 2H).

<sup>13</sup>C NMR (CDCl<sub>3</sub>) δ 144.7, 133.6, 129.9, 128.0, 70.8, 37.8, 37.6, 33.6, 29.9, 29.5, 29.0, 28.9, 26.90, 26.87, 26.6, 25.4, 21.7.

FT-IR (neat) 3063, 3027, 2986, 2933, 2858, 1604, 1496, 1454, 1378, 1369, 1248, 1215, 1156, 1055, 859, 747, 699 cm<sup>-1</sup>.

MS (ESI) *m/z* (M<sup>+</sup>) calcd for C<sub>21</sub>H<sub>34</sub>O<sub>3</sub>S: 366.2, found: 384.3 (M<sup>+</sup> + NH<sub>4</sub>).

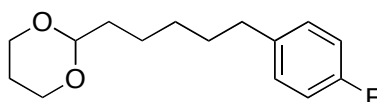

**2-(5-(4-Fluorophenyl)pentyl)-1,3-dioxane (Table 3, entry 10).** 2-(2-Bromoethyl)-1,3-dioxane (195 mg, 1.0 mmol) and a solution of the boron reagent prepared by hydroboration of 1-allyl-4-fluorobenzene with 9-BBN dimer (1.5 M solution in *i*-Pr<sub>2</sub>O; 1.2 mL, 1.8 mmol) were used. The product was purified by flash chromatography (5% Et<sub>2</sub>O/hexanes). Pale-yellow oil. First run: 172 mg (68%). Second run: 181 mg (72%).

TLC: R<sub>f</sub> = 0.3 (25% Et<sub>2</sub>O/hexanes; UV).

<sup>1</sup>H NMR (CDCl<sub>3</sub>) δ 7.13-7.07 (m, 2H), 6.98-6.91 (m, 2H), 4.49 (t, 1H, J = 5.1 Hz), 4.12-4.06 (m, 2H), 3.79-3.70 (m, 2H), 2.56 (t, 2H, J = 7.6 Hz), 2.15-2.00 (m, 1H), 1.64-1.54 (m, 4H), 1.46-1.28 (m, 5H).

<sup>13</sup>C NMR (CDCl<sub>3</sub>) δ 129.8, 129.7, 115.2, 114.9, 102.4, 67.0, 35.3, 35.1, 31.6, 29.1, 26.0, 23.9.

FT-IR (neat) 2929, 2855, 1601, 1510, 1221, 1146, 998, 824 cm<sup>-1</sup>.

MS (EI) *m/z* (M<sup>+</sup>) calcd for C<sub>15</sub>H<sub>21</sub>FO<sub>2</sub>: 252.2, found: 251.1 (M<sup>+</sup> - H).

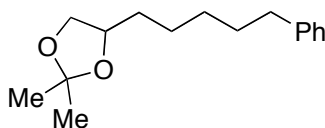

**2,2-Dimethyl-4-(5-phenylpentyl)-1,3-dioxolane (Table 3, entry 11).** 4-(2-Iodoethyl)-2,2-dimethyl-1,3-dioxolane (256 mg, 1.0 mmol) and a solution of the boron reagent prepared by hydroboration of allylbenzene with 9-BBN dimer (1.5 M solution in *i*-Pr<sub>2</sub>O; 1.2 mL, 1.8 mmol) were used. The product was purified by flash chromatography (5% Et<sub>2</sub>O/hexanes). Colorless oil. First run: 198 mg (79%). Second run: 194 mg (78%).

TLC: R<sub>f</sub> = 0.5 (25% Et<sub>2</sub>O/hexanes; KMnO<sub>4</sub>).

<sup>1</sup>H NMR (CDCl<sub>3</sub>) δ 7.31-7.25 (m, 2H), 7.20-7.15 (m, 3H), 4.10-4.00 (m, 2H), 3.49 (t, 1H, J = 7.1 Hz), 2.61 (t, 2H, J = 7.6 Hz), 1.72-1.54 (m, 3H), 1.54-1.18 (m, 11H).

$^{13}\text{C}$  NMR ( $\text{CDCl}_3$ )  $\delta$  142.8, 128.5, 128.4, 125.8, 108.7, 76.2, 69.7, 36.0, 33.7, 31.5, 29.4, 27.1, 25.9, 25.8.

FT-IR (neat) 3063, 3027, 2986, 2933, 2858, 1604, 1496, 1454, 1378, 1369, 1248, 1215, 1156, 1055, 859, 747, 699  $\text{cm}^{-1}$ .

MS (EI)  $m/z$  ( $\text{M}^+$ ) calcd for  $\text{C}_{16}\text{H}_{24}\text{O}_2$ : 248.2, found: 248.2.

### III. Kinetics Data

**General procedure for the preparation of the boron reagent.** In a glovebox, 9-BBN dimer (1.10 g, 4.5 mmol), *i*-Pr<sub>2</sub>O (3.75 mL), and allylbenzene (1.19 mL, 9.0 mmol) were added to a 20-mL vial equipped with a stir bar. Then, the vial was capped, and the reaction mixture was stirred vigorously at 60 °C for 1 h. Next, the mixture was allowed to cool to r.t. and diluted with *i*-Pr<sub>2</sub>O (6 mL). Then, KO*t*-Bu (0.73 g, 6.0 mmol) and *i*-BuOH (0.92 mL, 10 mmol) were added, and the resulting mixture was stirred at r.t. for 30 min.

**General procedure for the Suzuki reaction.** NiBr<sub>2</sub>•diglyme (4.2 mg, 0.012 mmol), ligand **1** (3.6  $\mu\text{L}$ , 0.016 mmol), and *i*-Pr<sub>2</sub>O (0.10 mL) were added to a 4-mL vial equipped with a stir bar. The mixture was stirred for 30 min, resulting in the formation of a pale-blue slurry. Next, a solution of cyclohexyl bromide and tetradecane (calibrated internal standard) in *i*-Pr<sub>2</sub>O were added, followed by the solution of the boron reagent. The reaction mixture was stirred vigorously at room temperature. Aliquots (100  $\mu\text{L}$ ) were removed after 5, 10, 15, and 20 minutes, and the amount of product was determined by GC analysis. The initial rates were determined by best fit of data from the first 20 minutes of reaction.

**Order in the catalyst.** Reactions were run with  $[\text{electrophile}]_0 = 0.37 \text{ M}$  and  $[\text{nucleophile}]_0 = 0.67 \text{ M}$ .

*Table S1.* Observed initial rates as a function of catalyst concentration.

| [catalyst] <sub>0</sub><br>(mM) | rate <sub>obs</sub><br>(M/h) |
|---------------------------------|------------------------------|
| 0                               | 0                            |
| 11                              | 0.21                         |
| 22                              | 0.34                         |
| 33                              | 0.63                         |
| 44                              | 0.86                         |

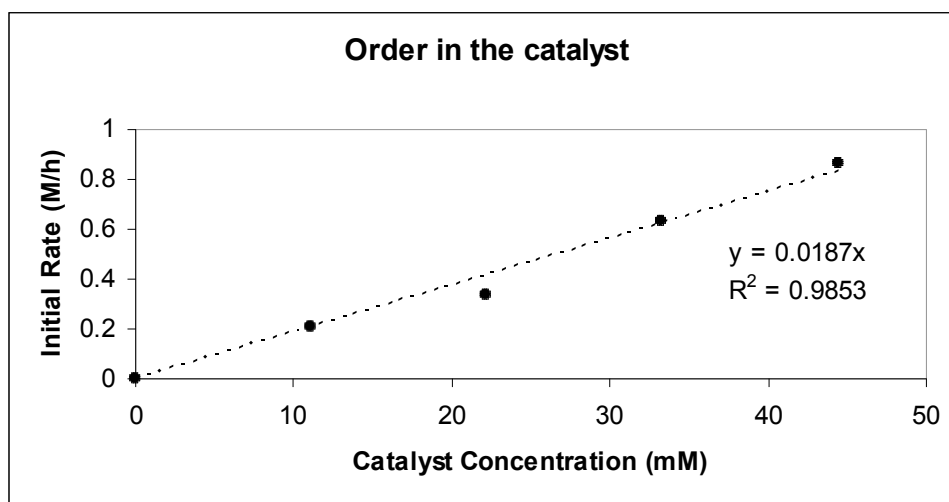

**Order in the nucleophile.** Reactions were run with  $[\text{catalyst}]_0 = 0.022 \text{ M}$  and  $[\text{electrophile}]_0 = 1.5 \text{ M}$ .

*Table S2.* Observed initial rates as a function of nucleophile concentration.

| $[\text{nucleophile}]_0$<br>(mM) | $\text{rate}_{\text{obs}}$<br>(M/h) |
|----------------------------------|-------------------------------------|
| 0                                | 0                                   |
| 210                              | 0.058                               |
| 420                              | 0.11                                |
| 620                              | 0.17                                |

The rate of the reaction was not well-behaved at a higher concentration of nucleophile.

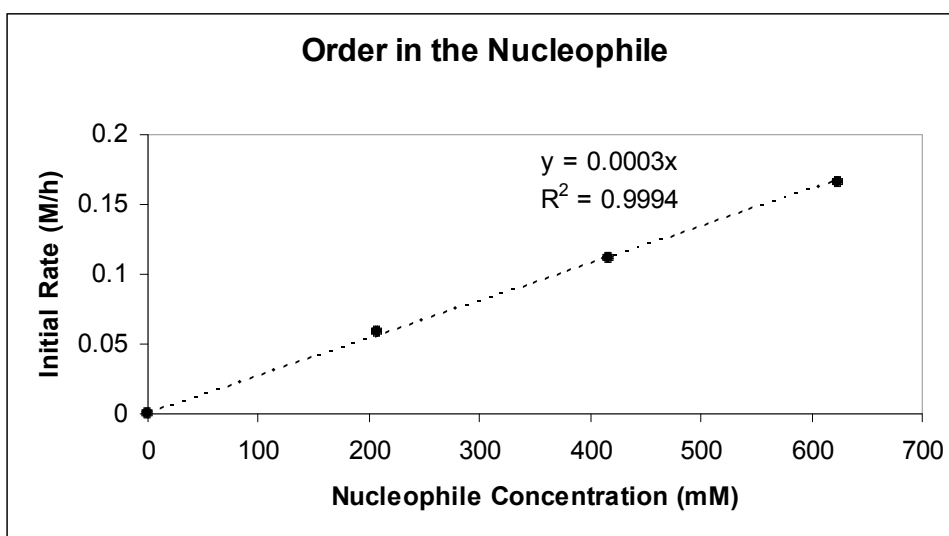

**Order in the Electrophile.** Reactions were run with  $[\text{catalyst}]_0 = 0.015 \text{ M}$  and  $[\text{nucleophile}]_0 = 0.92 \text{ M}$ .

*Table S3.* Observed initial rates as a function of electrophile concentration.

| $[\text{electrophile}]_0$<br>(mM) | $\text{rate}_{\text{obs}}$<br>(M/h) |
|-----------------------------------|-------------------------------------|
| 0                                 | 0                                   |
| 64                                | 0.16                                |
| 130                               | 0.22                                |
| 190                               | 0.17                                |
| 260                               | 0.23                                |

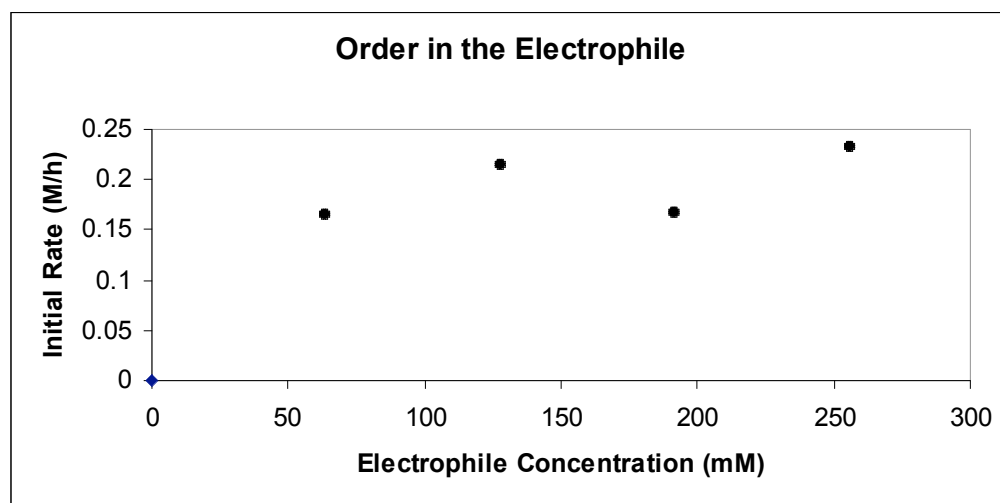

#### IV. $^1\text{H}$ NMR Spectra

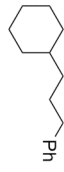

Table 2, entry 1

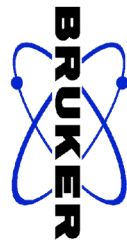

Current Data Parameters  
 NAME ZL-III-299A  
 EXNO 1  
 PROCNO 1

F2 - Acquisition Parameters

Date\_ 20081004  
 Time 17.27  
 INSTRUM spect  
 PROBHD 5 mm BBO BB-1H  
 PULPROG zg30  
 TD 65536  
 SOLVENT CDCl3  
 NS 16  
 DS 0  
 SWH 8278.146 Hz  
 FIDRES 0.126314 Hz  
 AQ 3.9584243 sec  
 RG 181  
 DW 60.400 usec  
 DE 6.00 usec  
 TE 298.2 K  
 D1 1.00000000 sec  
 TD0 1

===== CHANNEL f1 =====  
 NUC1 1H  
 P1 15.07 usec  
 PL1 0.00 dB  
 SFO1 400.1324710 MHz

F2 - Processing parameters  
 SI 65536  
 SF 400.130142 MHz  
 MDW 0  
 SSB 0  
 LB 0.30 Hz  
 GB 0  
 PC 1.00

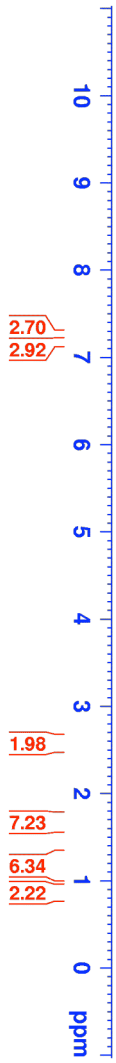

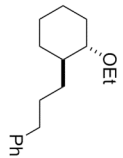

Table 2, entry 2

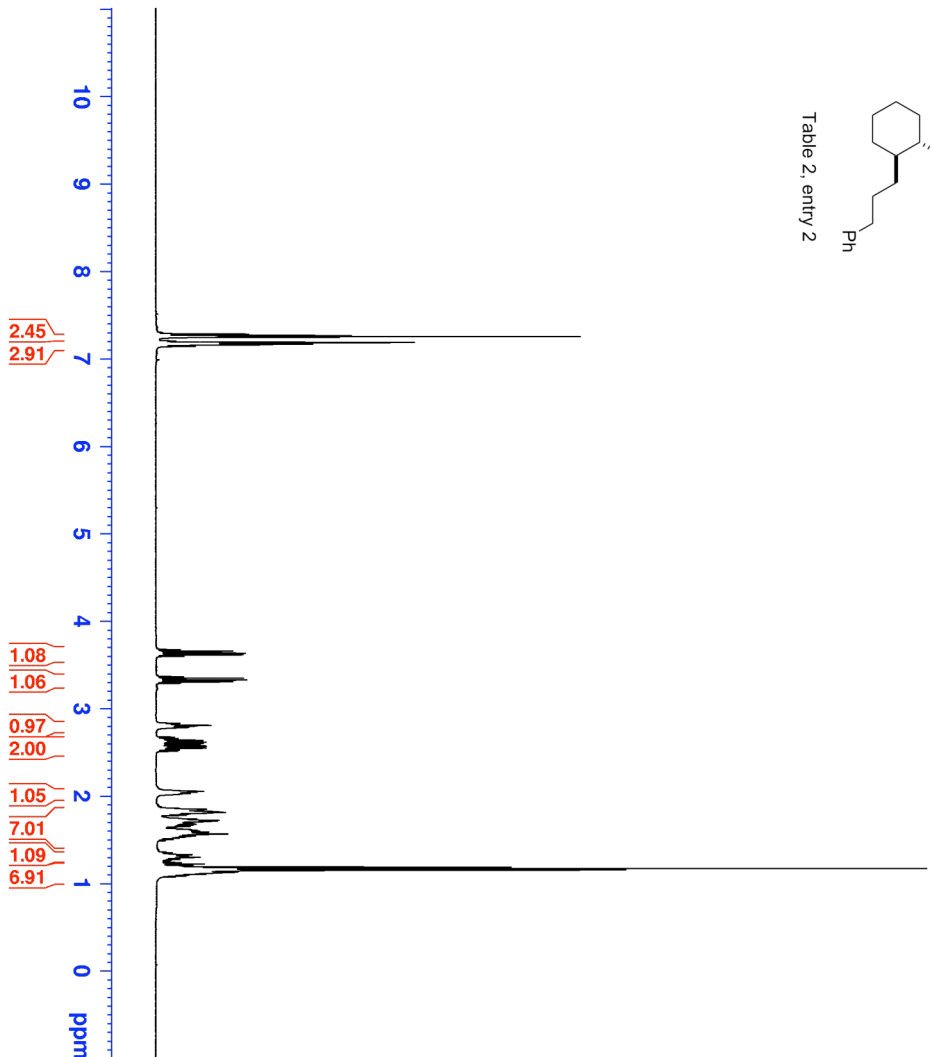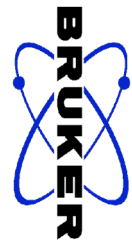

Current Data Parameters  
 NAME ZL-IV-033A  
 EXPNO 1  
 PROCNO 1

F2 - Acquisition Parameters  
 Date\_ 20081011  
 Time 15.20

INSTRUM spect  
 PROBHD 5 mm BBO BB-1H  
 PULPROG zg30  
 TD 65536  
 SOLVENT CDCl3  
 NS 16  
 DS 0

SWH 8278.146 Hz  
 FIDRES 0.126314 Hz  
 AQ 3.9584243 sec  
 RG 114

DW 60.400 usec  
 DE 6.00 usec  
 TE 293.2 K  
 D1 1.00000000 sec  
 TD0 1

===== CHANNEL f1 =====  
 NUC1 1H  
 P1 15.07 usec  
 PL1 0.00 dB  
 SFO1 400.1324710 MHz

F2 - Processing parameters  
 SI 65536  
 SF 400.130106 MHz  
 MDW 0  
 SSB 0  
 LB 0.30 Hz  
 GB 0  
 PC 1.00

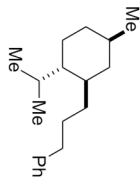

Table 2, entry 3

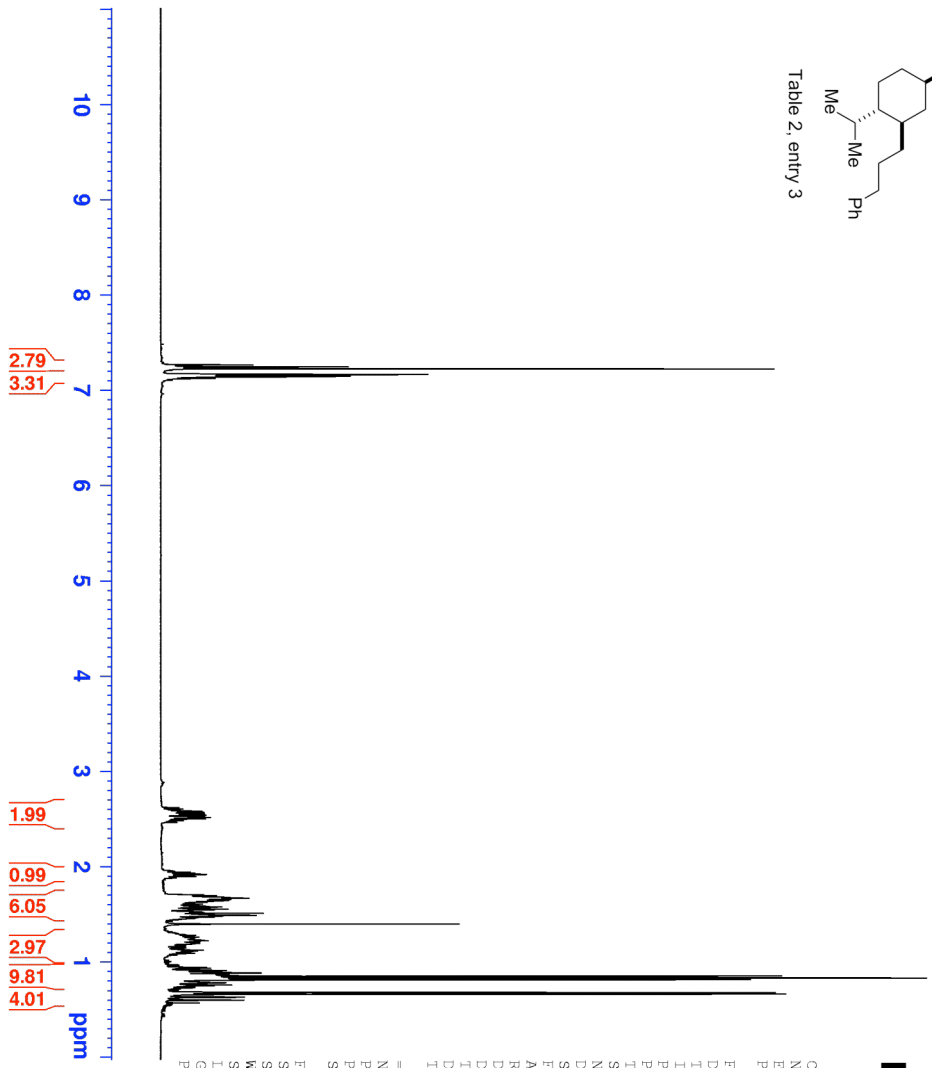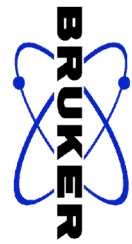

Current Data Parameters  
 NAME ZL-IV-036B  
 EXPNO 1  
 PROCNO 1

F2 - Acquisition Parameters  
 Date\_ 20081012  
 Time 17.03

INSTRUM spect  
 PROBHD 5 mm BBO BB-1H  
 PULPROG zg30  
 TD 65536  
 SOLVENT CDCl3  
 NS 16

DS 2  
 SWH 8278.146 Hz  
 FIDRES 0.126314 Hz  
 AQ 3.9584243 sec

RG 128  
 DW 60.400 usec  
 DE 6.00 usec  
 TE 293.2 K  
 D1 1.00000000 sec  
 TD0 1

===== CHANNEL f1 =====  
 NUC1 1H  
 P1 15.07 usec  
 PL1 0.00 dB  
 SFO1 400.1324710 MHz

F2 - Processing parameters  
 SI 65536  
 SF 400.1300227 MHz  
 NDW EM  
 SSB 0  
 LB 0.30 Hz  
 GB 0  
 PC 1.00



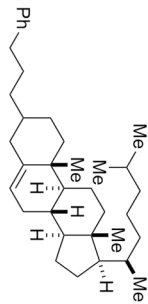

Table 2, entry 4

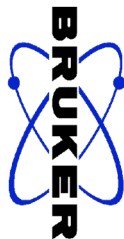

Current Data Parameters  
 NAME ZL-IV-027A  
 EXPNO 1  
 PROCNO 1

F2 - Acquisition Parameters

Date\_ 20081011  
 Time 15.30  
 INSTRUM spect  
 PROBHD 5 mm BBO BB-1H  
 PULPROG zg30  
 TD 65536  
 SOLVENT CDCl3  
 NS 16  
 DS 0  
 SWH 8278.146 Hz  
 FIDRES 0.126314 Hz  
 AQ 3.9584243 sec  
 RG 128  
 DW 60.400 usec  
 DE 6.00 usec  
 TE 293.2 K  
 D1 1.00000000 sec  
 TD0 1

===== CHANNEL f1 =====  
 NUC1 1H  
 P1 15.07 usec  
 PL1 0.00 dB  
 SFO1 400.1324710 MHz

F2 - Processing parameters  
 SI 65536  
 SF 400.130117 MHz  
 MDW DM  
 SSB 0  
 LB 0.30 Hz  
 GB 0  
 PC 1.00

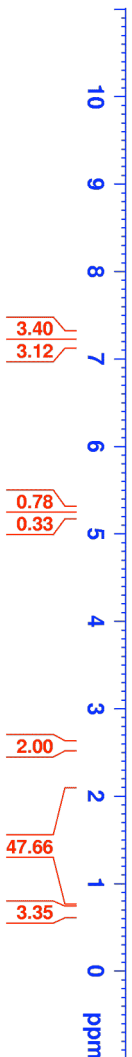

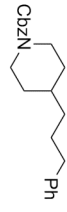

Table 2, entry 5

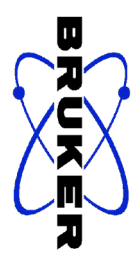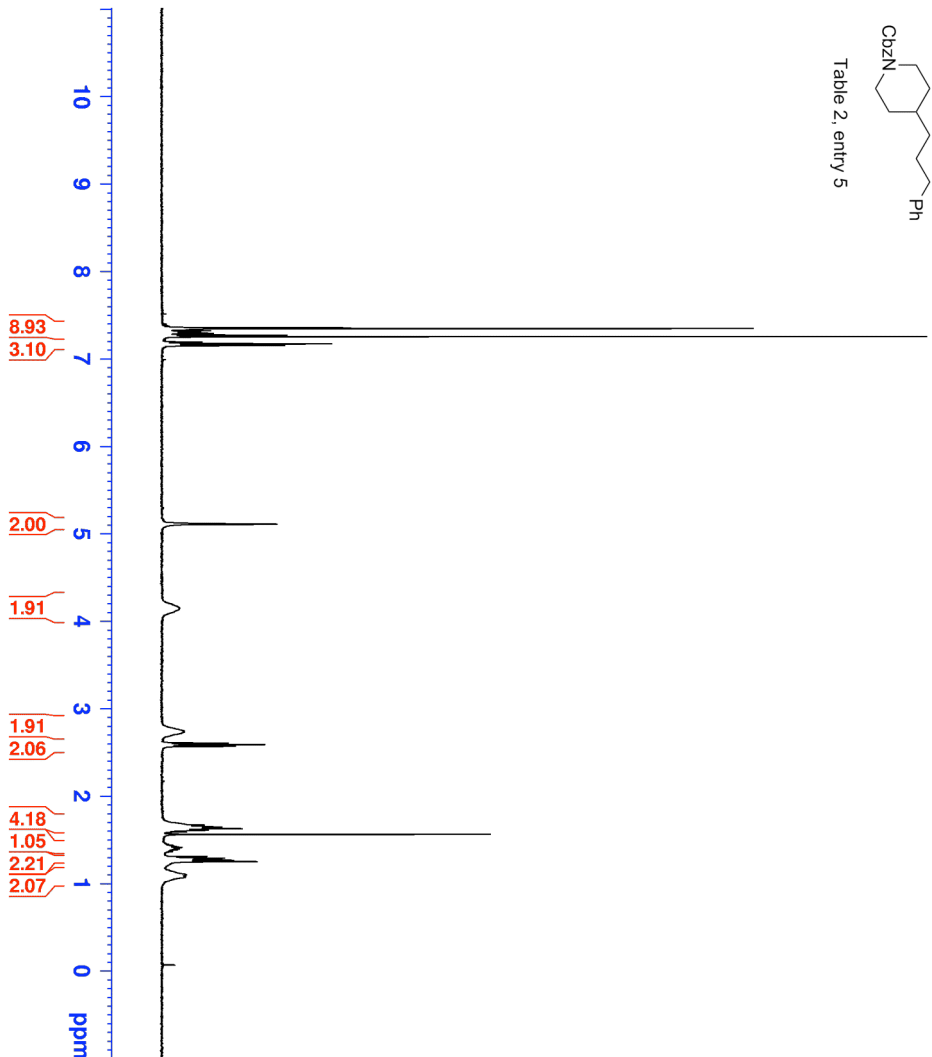

Current Data Parameters  
 NAME ZL-IV-020B  
 EXPNO 1  
 PROCNO 1

F2 - Acquisition Parameters  
 Date\_ 20081012  
 Time 11.06

INSTRUM spect  
 PROBHD 5 mm BBO BB-1H  
 PULPROG zg30  
 TD 65536  
 SOLVENT CDCl3  
 NS 16

DS 0  
 SWH 8278.146 Hz  
 FIDRES 0.126314 Hz  
 AQ 3.9584243 sec  
 RG 287.4  
 DW 60.400 usec  
 DE 6.00 usec  
 TE 293.2 K  
 D1 1.00000000 sec  
 TD0 1

===== CHANNEL f1 =====  
 NUC1 1H  
 P1 15.07 usec  
 PL1 0.00 dB  
 SFO1 400.1324710 MHz

F2 - Processing parameters  
 SI 65536  
 SF 400.130104 MHz  
 NDW 0  
 SSB 0  
 LB 0.30 Hz  
 GB 0  
 PC 1.00

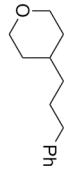

Table 2, entry 6

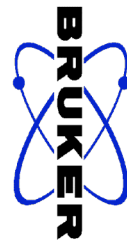

Current Data Parameters  
 NAME ZL-IV-019B  
 EXPNO 1  
 PROCNO 1

F2 - Acquisition Parameters  
 Date\_ 20081007

Time 19.36  
 INSTRUM spect  
 PROBHD 5 mm BBO BB-1H  
 PULPROG zg30  
 TD 65536  
 SOLVENT CDCl3  
 NS 16  
 DS 0  
 SWH 8278.146 Hz  
 FIDRES 0.126314 Hz  
 AQ 3.9584243 sec  
 RG 128  
 DW 60.400 usec  
 DE 6.00 usec  
 TE 298.2 K  
 D1 1.00000000 sec  
 TD0 1

===== CHANNEL f1 =====  
 NUC1 1H  
 P1 15.07 usec  
 PL1 0.00 dB  
 SFO1 400.1324710 MHz

F2 - Processing parameters  
 SI 66536  
 SF 400.130139 MHz  
 MDW DM  
 SSB 0  
 LB 0.30 Hz  
 GB 0  
 PC 1.00

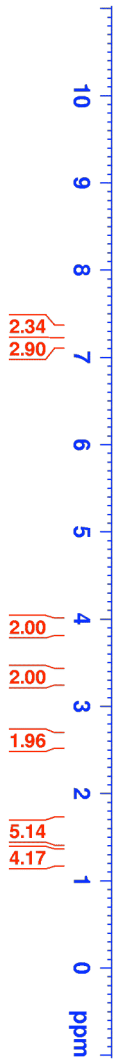

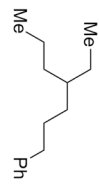

Table 2, entry 7

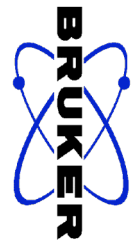

Current Data Parameters  
 NAME ZL-IV-023  
 EXPNO 1  
 PROCNO 1

F2 - Acquisition Parameters  
 Date\_ 20081004

Time 15.40  
 INSTRUM spect  
 PROBHD 5 mm BBO BB-1H  
 PULPROG zg30  
 TD 65536  
 SOLVENT NS

DS 16  
 SWH 8278.146 Hz  
 FIDRES 0.126314 Hz  
 AQ 3.9584243 sec  
 RG 128  
 DW 60.400 usec  
 DE 6.00 usec  
 TE 298.2 K  
 D1 1.00000000 sec  
 TD0 1

===== CHANNEL f1 =====  
 NUC1 1H  
 P1 15.07 usec  
 PL1 0.00 dB  
 SFO1 400.1324710 MHz

F2 - Processing parameters  
 SI 65536  
 SF 400.130098 MHz  
 NDW 0  
 EX 0  
 SSB 0  
 LB 0.30 Hz  
 GB 0  
 PC 1.00

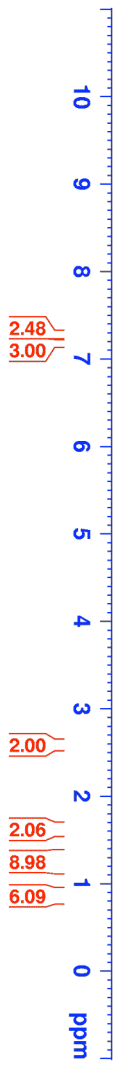

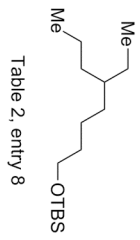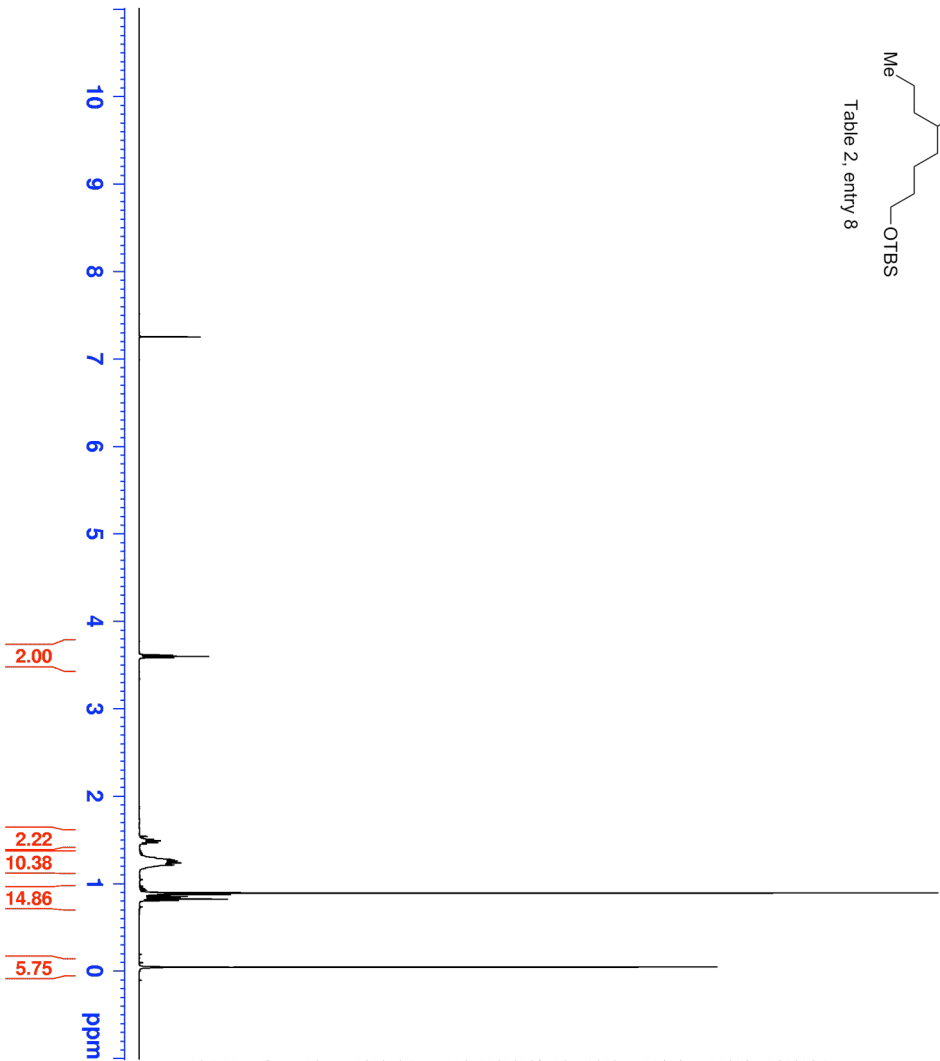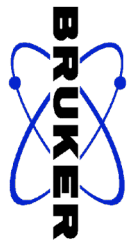

Current Data Parameters  
 NAME ZL-IV-034  
 EXPNO 1  
 PROCNO 1

F2 - Acquisition Parameters  
 Date\_ 20081004

Time 15.19  
 INSTRUM spect  
 PROBHD 5 mm BBO BB-1H  
 PULPROG zg30  
 TD 65536  
 SOLVENT CDCl3  
 NS 16  
 DS 0  
 SWH 8278.146 Hz  
 FIDRES 0.126314 Hz  
 AQ 3.9584243 sec  
 RG 128  
 DW 60.400 usec  
 DE 6.00 usec  
 TE 298.2 K  
 D1 1.00000000 sec  
 TD0 1

===== CHANNEL f1 =====  
 NUC1 1H  
 P1 15.07 usec  
 PL1 0.00 dB  
 SFO1 400.1324710 MHz

F2 - Processing parameters  
 SI 65536  
 SF 400.130113 MHz  
 MDW DM  
 SSB 0  
 LB 0.30 Hz  
 GB 0  
 PC 1.00

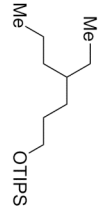

Table 2, entry 9

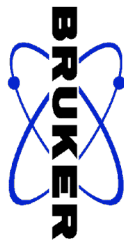

Current Data Parameters  
 NAME ZL-IV-028  
 EXNO 1  
 PROCNO 1

F2 - Acquisition Parameters

Date\_ 20081005  
 Time 15.51  
 INSTRUM spect  
 PROBHD 5 mm BBO BB-1H  
 PULPROG zg30  
 TD 65536  
 SOLVENT CDCl3  
 NS 16  
 DS 0  
 SWH 8278.146 Hz  
 FIDRES 0.126314 Hz  
 AQ 3.9584243 sec  
 RG 128  
 DW 60.400 usec  
 DE 6.00 usec  
 TE 298.2 K  
 D1 1.00000000 sec  
 TD0 1

===== CHANNEL f1 =====  
 NUC1 1H  
 P1 15.07 usec  
 PL1 0.00 dB  
 SFO1 400.1324710 MHz

F2 - Processing parameters  
 SI 66536  
 SF 400.130120 MHz  
 MDW EX  
 SSB 0  
 LB 0.30 Hz  
 GB 0  
 PC 1.00

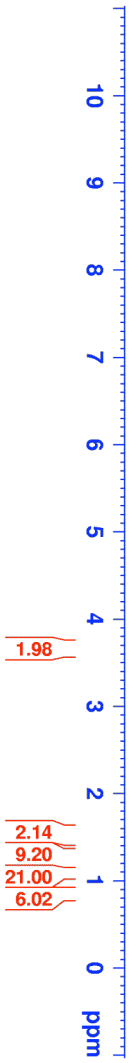

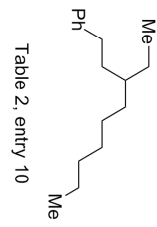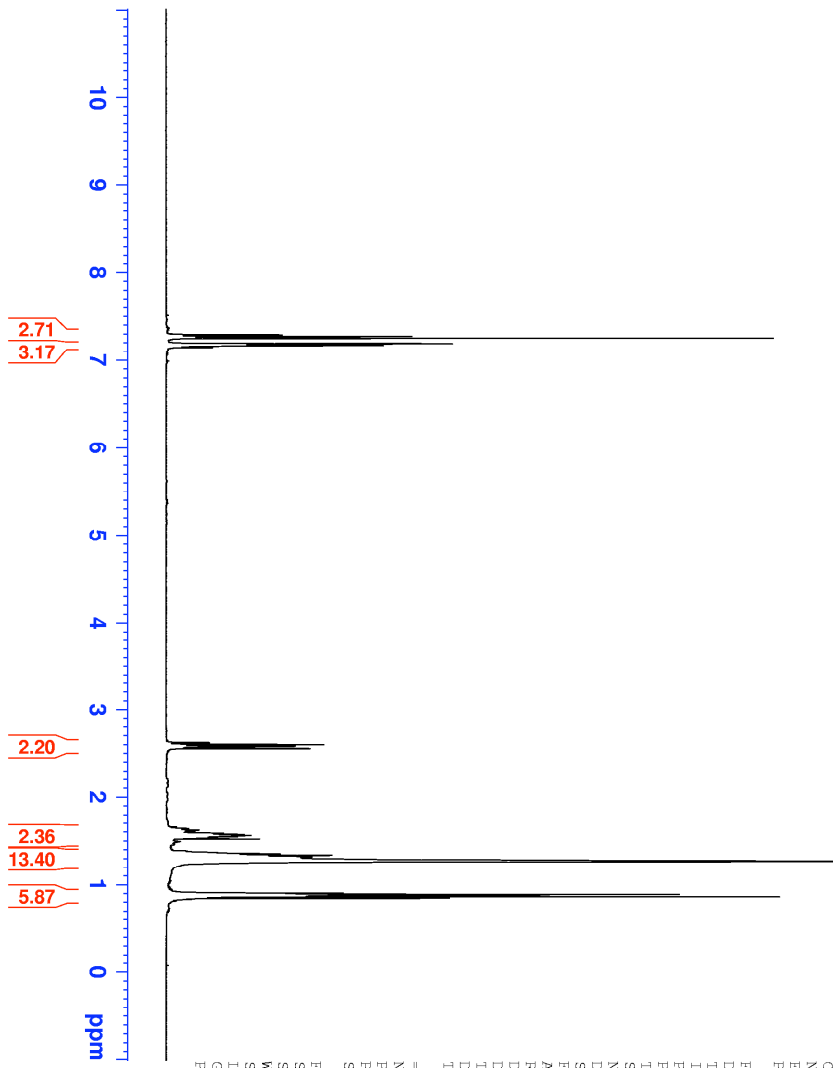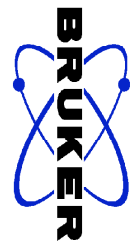

Current Data Parameters  
 NAME ZL-1V-015  
 EXPNO 1  
 PROCNO 1

F2 - Acquisition Parameters  
 Date\_ 20081004  
 Time 15:01  
 INSTRUM spect  
 PROBHID 5 mm BBO BB-1H  
 PULPROG zg30  
 TD 65536  
 SOLVENT CDCl3  
 NS 16  
 DS 0  
 SWH 8278.146 Hz  
 FIDRES 0.126314 Hz  
 AQ 3.9584243 sec  
 RG 128  
 DW 60.400 usec  
 DE 6.00 usec  
 TE 298.2 K  
 D1 1.00000000 sec  
 TDO 1

===== CHANNEL f1 =====  
 NUC1 1H  
 P1 15.07 usec  
 PL1 0.00 dB  
 SFO1 400.1324710 MHz

F2 - Processing parameters  
 SI 468536  
 SF 400.1300119 MHz  
 WDW EX  
 SSB 0  
 LB 0.30 Hz  
 GB 0  
 PC 1.00

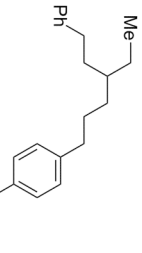

Table 2, entry 11

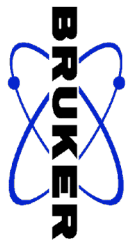

Current Data Parameters  
 NAME ZL-IV-037A  
 EXPNO 1  
 PROCNO 1

F2 - Acquisition Parameters  
 Date\_ 20081007

Time 10.42  
 INSTRUM spect  
 PROBHD 5 mm QNP 1H/13  
 PULPROG zg30  
 TD 65536  
 SOLVENT CDCl3  
 NS 16  
 DS 0

SWH 8278.146 Hz  
 FIDRES 0.126314 Hz  
 AQ 3.9584243 sec  
 RG 456.1  
 DW 60.400 usec  
 DE 6.00 usec  
 TE 292.2 K  
 D1 1.00000000 sec  
 TD0 1

===== CHANNEL f1 =====  
 NUC1 1H  
 P1 14.00 usec  
 PL1 0.00 dB  
 SFO1 400.1324710 MHz

F2 - Processing parameters  
 SI 65536  
 SF 400.1300220 MHz  
 MDW 0  
 SSB 0  
 LB 0.30 Hz  
 GB 0  
 PC 1.00

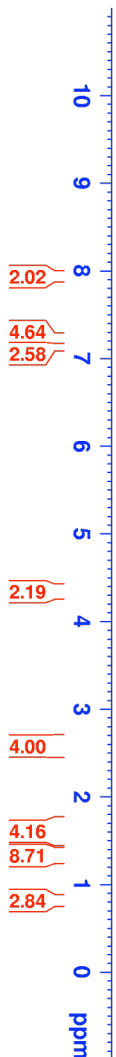



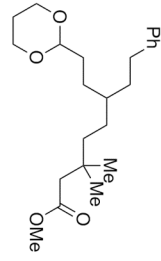

Table 2, entry 12

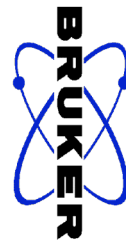

Current Data Parameters  
 NAME ZL-IV-041A  
 EXPNO 1  
 PROCNO 1

F2 - Acquisition Parameters  
 Date\_ 20081007

Time 10.57  
 INSTRUM spect  
 PROBHD 5 mm QNP 1H/13  
 PULPROG zg30  
 TD 65536  
 SOLVENT CDCl3  
 NS 12  
 DS 0  
 SWH 8278.146 Hz  
 FIDRES 0.126314 Hz  
 AQ 3.9584243 sec  
 RG 362  
 DW 60.400 usec  
 DE 6.00 usec  
 TE 292.2 K  
 D1 1.00000000 sec  
 TD0 1

===== CHANNEL f1 =====  
 NUC1 1H  
 P1 14.00 usec  
 PL1 0.00 dB  
 SFO1 400.1324710 MHz

F2 - Processing parameters  
 SI 65536  
 SF 400.130097 MHz  
 MDW DM  
 SSB 0  
 LB 0.30 Hz  
 GB 0  
 PC 1.00

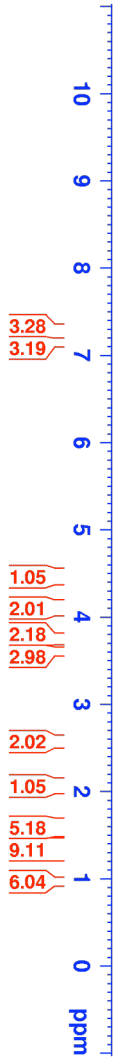

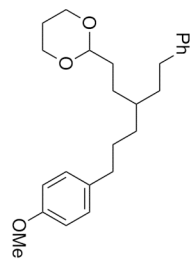

Table 2, entry 13

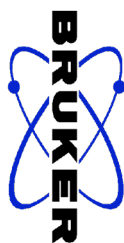

Current Data Parameters  
 NAME ZL-IV-0403  
 EXPNO 1  
 PROCNO 1

F2 - Acquisition Parameters

Date\_ 20081008  
 Time 13.14  
 INSTRUM spect  
 PROBHD 5 mm BBO BB-1H  
 PULPROG zg30  
 TD 65536  
 SOLVENT  
 NS 16  
 DS 0  
 SWH 8278.146 Hz  
 FIDRES 0.126314 Hz  
 AQ 3.9584243 sec  
 RG 128  
 DW 60.400 usec  
 DE 6.00 usec  
 TE 294.2 K  
 D1 1.00000000 sec  
 TD0 1

===== CHANNEL f1 =====  
 NUC1 1H  
 P1 15.07 usec  
 PL1 0.00 dB  
 SFO1 400.1324710 MHz

F2 - Processing parameters  
 SI 65536  
 SF 400.130137 MHz  
 MDW DM  
 SSB 0  
 LB 0.30 Hz  
 GB 0  
 PC 1.00

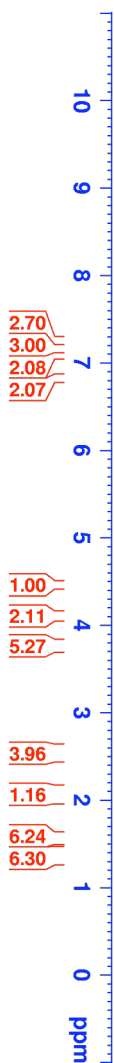

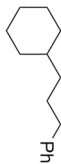

Table 3, entry 1

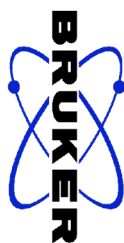

Current Data Parameters  
 NAME ZL-IV-067A  
 EXPNO 1  
 PROCNO 1

F2 - Acquisition Parameters  
 Date\_ 20081218  
 Time 12.05

INSTRUM spect  
 PROBHD 5 mm BBO BB-1H  
 PULPROG zg30  
 TD 65536  
 SOLVENT CDCl3  
 NS 16  
 DS 0

SWH 8278.146 Hz  
 FIDRES 0.126314 Hz  
 AQ 3.9584243 sec  
 RG 181

DW 60.400 usec  
 DE 6.00 usec  
 TE 293.2 K  
 D1 1.00000000 sec  
 TD0 1

===== CHANNEL f1 =====  
 NUC1 1H  
 P1 15.07 usec  
 PL1 0.00 dB  
 SFO1 400.1324710 MHz  
 F2 - Processing parameters  
 SI 66536  
 SF 400.130096 MHz  
 MDW 0  
 SSB 0  
 LB 0.30 Hz  
 GB 0  
 PC 1.00

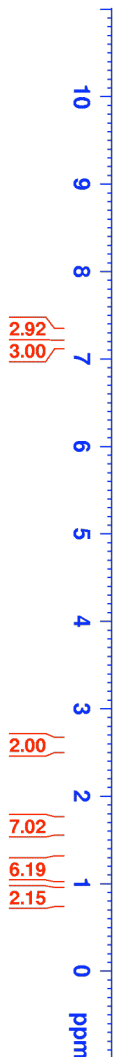

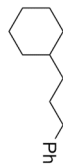

Table 3, entry 2

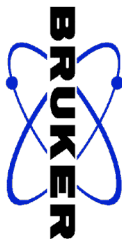

Current Data Parameters  
 NAME ZL-IV-064C  
 EXPNO 1  
 PROCNO 1

F2 - Acquisition Parameters  
 Date\_ 20081218

Time 12.50  
 INSTRUM spect  
 PROBHD 5 mm BBO BB-1H  
 PULPROG zg30  
 TD 65536  
 SOLVENT CDCl3  
 NS 16  
 DS 2

SWH 8278.146 Hz  
 FIDRES 0.126314 Hz  
 AQ 3.9584243 sec  
 RG 128  
 DW 60.400 usec  
 DE 6.00 usec  
 TE 293.2 K  
 D1 1.00000000 sec  
 TD0 1

===== CHANNEL f1 =====  
 NUC1 1H  
 P1 15.07 usec  
 PL1 0.00 dB  
 SFO1 400.1324710 MHz

F2 - Processing parameters  
 SI 65536  
 SF 400.130039 MHz  
 MDW 0  
 SSB 0  
 LB 0.30 Hz  
 GB 0  
 PC 1.00

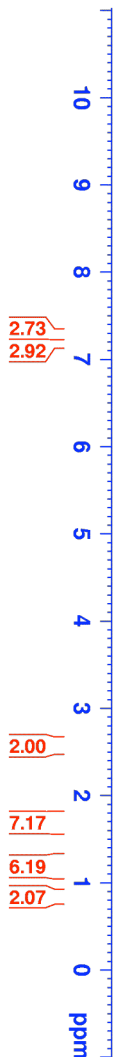

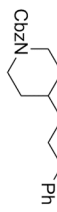

Table 3, entry 3

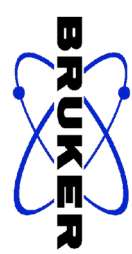

Current Data Parameters  
 NAME ZL-IV-069C  
 EXPNO 1  
 PROCNO 1

F2 - Acquisition Parameters

Date\_ 20081220  
 Time 16.35  
 INSTRUM spect  
 PROBHD 5 mm BBO BB-1H  
 PULPROG zg30  
 TD 65536  
 SOLVENT CDCl3  
 NS 16  
 DS 0  
 SWH 8278.146 Hz  
 FIDRES 0.126314 Hz  
 AQ 3.9584243 sec  
 RG 128  
 DW 60.400 usec  
 DE 6.00 usec  
 TE 293.2 K  
 D1 1.00000000 sec  
 TD0 1

===== CHANNEL f1 =====  
 NUC1 1H  
 P1 15.07 usec  
 PL1 0.00 dB  
 SFO1 400.1324710 MHz

F2 - Processing parameters  
 SI 65536  
 SF 400.130039 MHz  
 NDW DM  
 SSB 0  
 LB 0.30 Hz  
 GB 0  
 PC 1.00

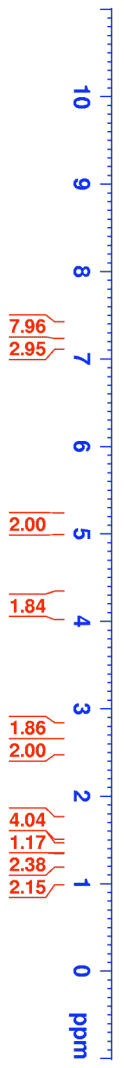

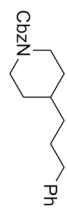

Table 3, entry 4

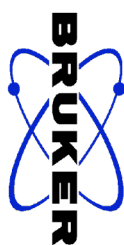

Current Data Parameters  
 NAME ZL-IV-069A  
 EXPNO 1  
 PROCNO 1

F2 - Acquisition Parameters  
 Date\_ 20081220  
 Time 15.13  
 INSTRUM spect  
 PROBHD 5 mm QNP 1H/13  
 PULPROG zg30  
 TD 65536  
 SOLVENT CDCl3  
 NS 16  
 DS 0  
 SWH 8278.146 Hz  
 FIDRES 0.126314 Hz  
 AQ 3.9584243 sec  
 RG 456.1  
 DW 60.400 usec  
 DE 6.00 usec  
 TE 291.2 K  
 D1 1.00000000 sec  
 TD0 1

===== CHANNEL f1 =====  
 NUC1 1H  
 P1 14.00 usec  
 PL1 0.00 dB  
 SFO1 400.1324710 MHz  
 F2 - Processing parameters  
 SI 65536  
 SF 400.1300924 MHz  
 NDW 0  
 SSB 0  
 LB 0.30 Hz  
 GB 0  
 PC 1.00

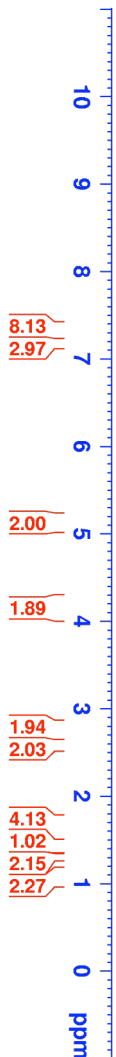

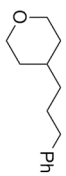

Table 3, entry 5

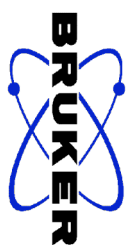

Current Data Parameters  
 NAME ZL-IV-073B  
 EXPNO 1  
 PROCNO 1

F2 - Acquisition Parameters

Date\_ 20081218  
 Time 17.50  
 INSTRUM spect  
 PROBHD 5 mm BBO BB-1H  
 PULPROG zg30  
 TD 65536  
 SOLVENT CDCl3  
 NS 16  
 DS 0  
 SWH 8278.146 Hz  
 FIDRES 0.126314 Hz  
 AQ 3.9584243 sec  
 RG 128  
 DW 60.400 usec  
 DE 6.00 usec  
 TE 293.2 K  
 D1 1.00000000 sec  
 TD0 1

===== CHANNEL f1 =====  
 NUC1 1H  
 P1 15.07 usec  
 PL1 0.00 dB  
 SFO1 400.1324710 MHz

F2 - Processing parameters  
 SI 65536  
 SF 400.130145 MHz  
 MDW DM  
 SSB 0  
 LB 0.30 Hz  
 GB 0  
 PC 1.00

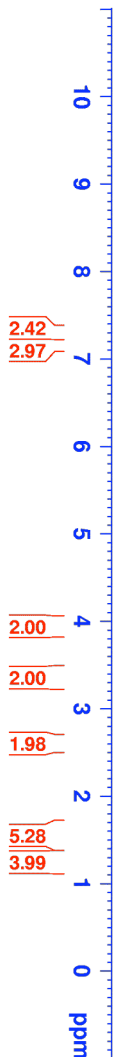

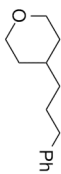

Table 3, entry 6

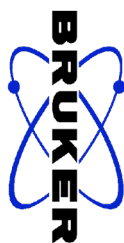

Current Data Parameters  
 NAME ZL-IV-067B  
 EXPRNO 1  
 PROCNO 1

F2 - Acquisition Parameters  
 Date\_ 20081218

Time 17.42  
 INSTRUM spect  
 PROBHD 5 mm BBO BB-1H  
 PULPROG zg30  
 TD 65536  
 SOLVENT CDCl<sub>3</sub>  
 NS 16  
 DS 0

SWH 8278.146 Hz  
 FIDRES 0.126314 Hz  
 AQ 3.9584243 sec  
 RG 128  
 DW 60.400 usec  
 DE 6.00 usec  
 TE 293.2 K  
 D1 1.00000000 sec  
 TD0 1

===== CHANNEL f1 =====  
 NUC1 1H  
 P1 15.07 usec  
 PL1 0.00 dB  
 SFO1 400.1324710 MHz

F2 - Processing parameters  
 SI 65536  
 SF 400.130098 MHz  
 MDW 0  
 SSB 0  
 LB 0.30 Hz  
 GB 0  
 PC 1.00

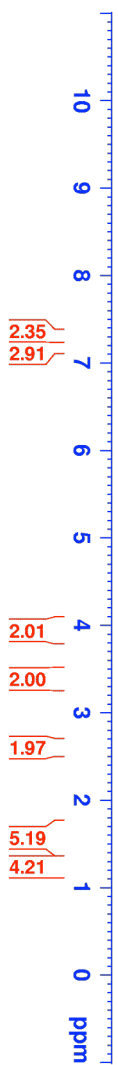



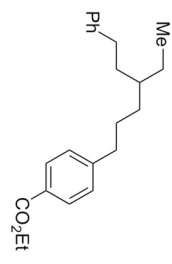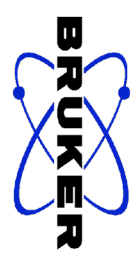

Current Data Parameters  
 NAME ZL-IV-071A  
 EXPRNO 1  
 PROCNO 1

F2 - Acquisition Parameters  
 Date\_ 20081219  
 Time 16.28  
 INSTRUM spect  
 PROBHD 5 mm QNP 1H/13  
 PULPROG zg30  
 TD 65536  
 SOLVENT CDCl3  
 NS 16  
 DS 0  
 SWH 8278.146 Hz  
 FIDRES 0.126314 Hz  
 AQ 3.9584243 sec  
 RG 456.1  
 DW 60.400 usec  
 DE 6.00 usec  
 TE 291.2 K  
 D1 1.00000000 sec  
 TD0 1

===== CHANNEL f1 =====  
 NUC1 1H  
 P1 14.00 usec  
 PL1 0.00 dB  
 SFO1 400.1324710 MHz  
 F2 - Processing parameters  
 SI 65536  
 SF 400.130128 MHz  
 MDW 0  
 SSB 0  
 LB 0.30 Hz  
 GB 0  
 PC 1.00

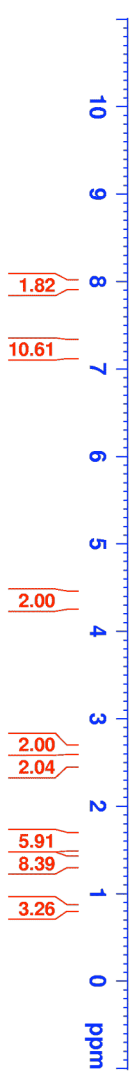

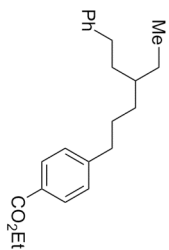

Table 3, entry 8

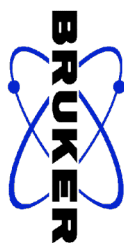

Current Data Parameters  
 NAME ZL-IV-071C  
 EXPRNO 1  
 PROCNO 1

F2 - Acquisition Parameters  
 Date\_ 20081219

Time 17.11  
 INSTRUM spect  
 PROBHD 5 mm QNP 1H/13  
 PULPROG zg30  
 TD 65536  
 SOLVENT CDCl3  
 NS 16  
 DS 0

SWH 8278.146 Hz  
 FIDRES 0.126314 Hz  
 AQ 3.9584243 sec  
 RG 512

DW 60.400 usec  
 DE 6.00 usec  
 TE 291.2 K  
 D1 1.00000000 sec  
 TD0 1

===== CHANNEL f1 =====  
 NUC1 1H  
 P1 14.00 usec  
 PL1 0.00 dB  
 SFO1 400.1324710 MHz

F2 - Processing parameters  
 SI 65536  
 SF 400.130112 MHz  
 MDW 0  
 SSB 0  
 LB 0.30 Hz  
 GB 0  
 PC 1.00

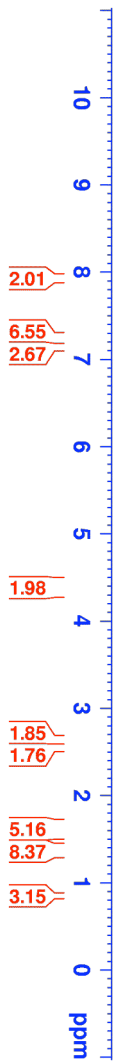

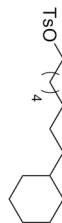

Table 3, entry 9

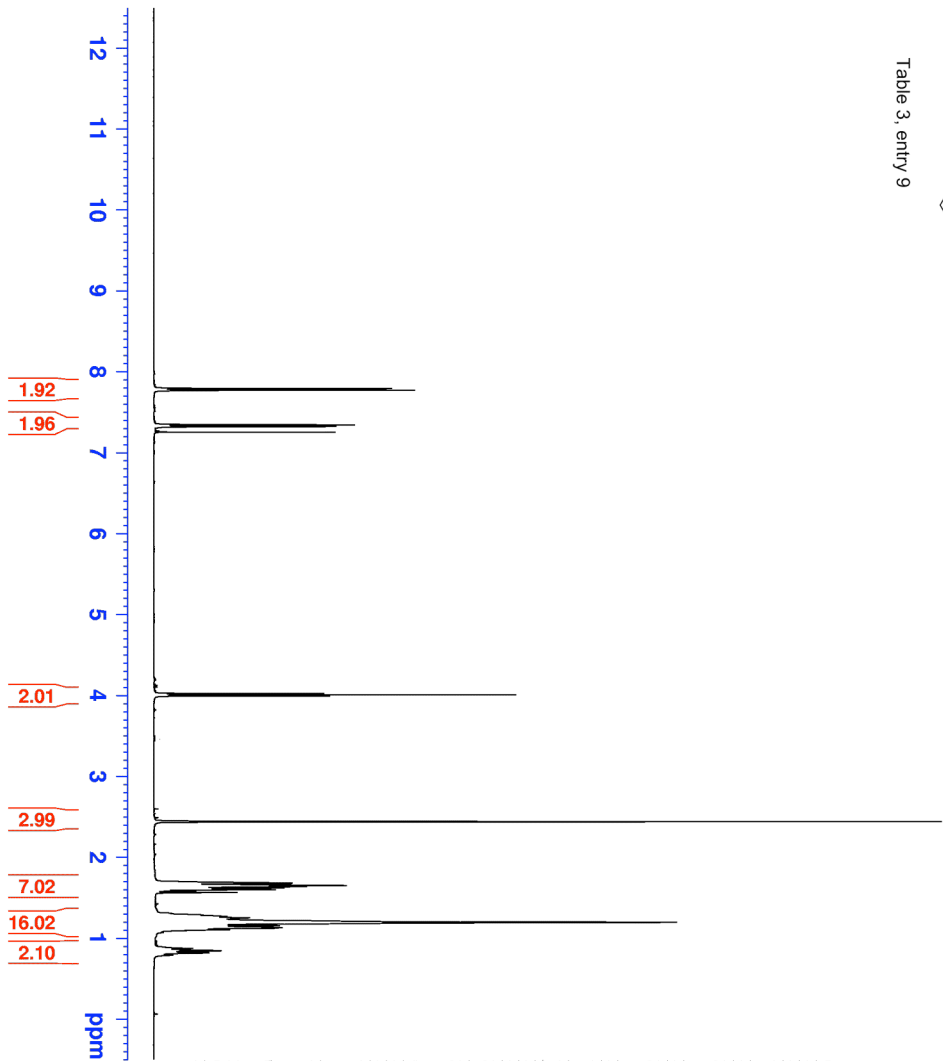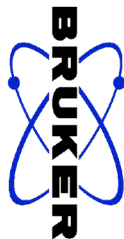

Current Data Parameters  
 NAME ZL-V-200\_1\_1col  
 EXPNO 1  
 PROCNO 1

F2 - Acquisition Parameters  
 Date\_ 20100417

Time 13.32  
 INSTRUM spect  
 PROBHD 5 mm BBO BB-1H  
 PULPROG zg30  
 TD 65536  
 SOLVENT CDCl3  
 NS 16  
 DS 0

SWH 8278.146 Hz  
 FIDRES 0.126314 Hz  
 AQ 3.9584243 sec  
 RG 128

DW 60.400 usec  
 DE 6.00 usec  
 TE 296.2 K  
 D1 1.00000000 sec  
 TD0 1

===== CHANNEL f1 =====  
 NUC1 1H  
 P1 15.07 usec  
 PL1 0.00 dB  
 SFO1 400.1324710 MHz

F2 - Processing parameters  
 SI 65536  
 SF 400.1300109 MHz  
 NDW EM  
 SSB 0  
 LB 0.30 Hz  
 GB 0  
 PC 1.00

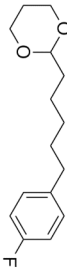

Table 3, entry 10

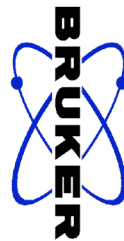

Current Data Parameters  
 NAME ZL-V-190\_BH-C011  
 EXNO 1  
 PROCNO 1

F2 - Acquisition Parameters

Date\_ 20100416  
 Time 13.04  
 INSTRUM spect  
 PROBHD 5 mm BBO BB-1H  
 PULPROG zg30  
 TD 65536  
 SOLVENT CDCl3  
 NS 16  
 DS 0  
 SWH 8278.146 Hz  
 FIDRES 0.126314 Hz  
 AQ 3.9584243 sec  
 RG 256  
 DW 60.400 usec  
 DE 6.00 usec  
 TE 296.2 K  
 D1 1.00000000 sec  
 TD0 1

===== CHANNEL f1 =====  
 NUC1 1H  
 P1 15.07 usec  
 PL1 0.00 dB  
 SFO1 400.1324710 MHz

F2 - Processing parameters  
 SI 65536  
 SF 400.130103 MHz  
 MDW 0  
 SSB 0  
 LB 0.30 Hz  
 GB 0  
 PC 1.00

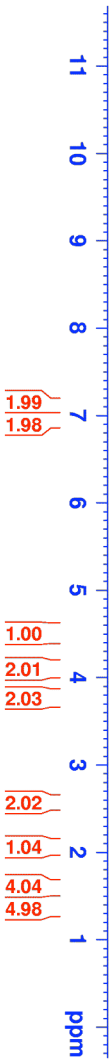

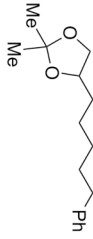

Table 3, entry 11

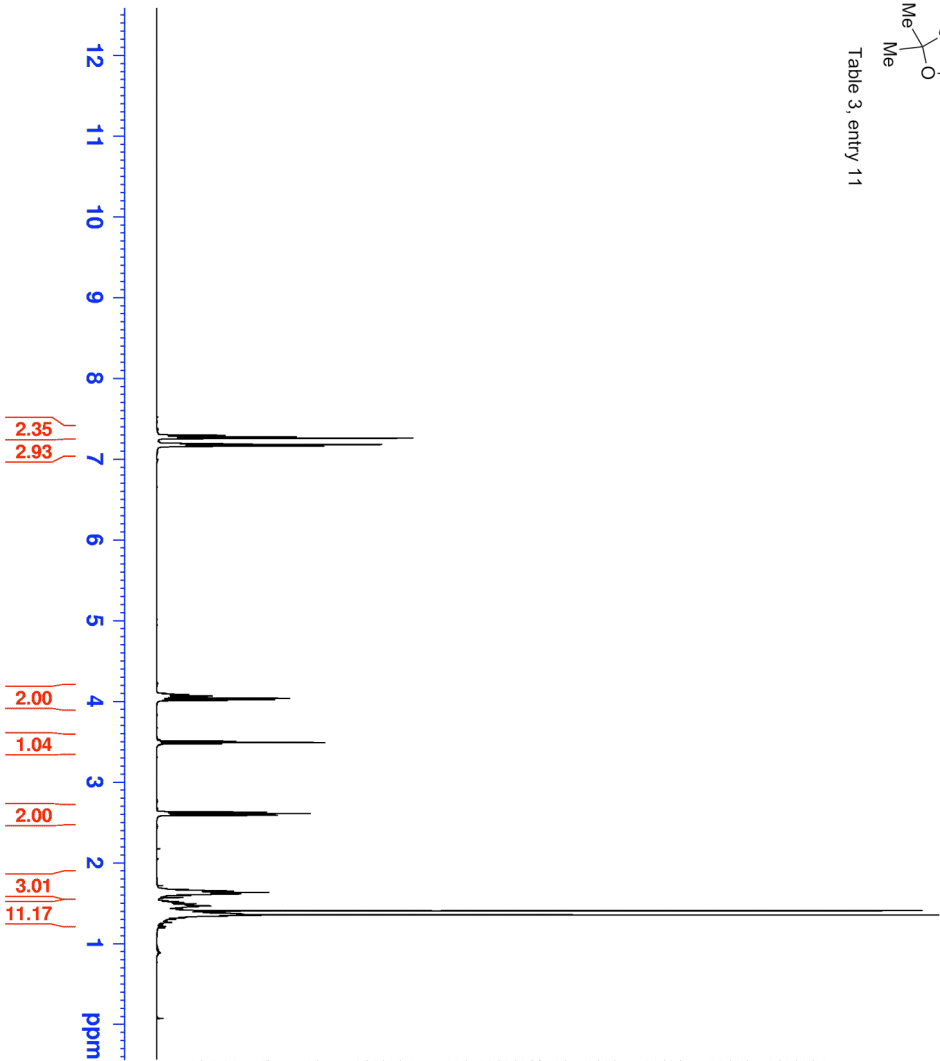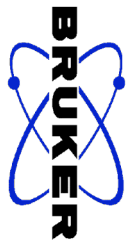

Current Data Parameters  
 NAME ZL-V-201\_1\_col1  
 EXPNO 1  
 PROCNO 1

F2 - Acquisition Parameters  
 Date\_ 20100417

Time 13.01  
 INSTRUM spect  
 PROBHD 5 mm BBO BB-1H  
 PULPROG zg30  
 TD 65536  
 SOLVENT CDCl3  
 NS 16

DS 0  
 SWH 8278.146 Hz  
 FIDRES 0.126314 Hz

AQ 3.9584243 sec  
 RG 101.6  
 DW 60.400 usec  
 DE 6.00 usec  
 TE 296.2 K  
 D1 1.00000000 sec  
 TD0 1

===== CHANNEL f1 =====  
 NUC1 1H  
 P1 15.07 usec  
 PL1 0.00 dB  
 SFO1 400.1324710 MHz

F2 - Processing parameters  
 SI 65536  
 SF 400.1300921 MHz  
 NDW 0  
 SSB 0  
 LB 0.30 Hz  
 GB 0  
 PC 1.00
